# Supplementary material for: Anxiolytic, Promnesic, Anti-Acetylcholinesterase and Antioxidant Effects of Cotinine and 6-Hydroxy-L-Nicotine in Scopolamine-Induced Zebrafish (Danio rerio) Model of Alzheimer’s Disease
Source: MDPI journal article supplement (doi:10.3390/antiox10020212), 2021-02-01
Supplement: s1 [file s1]

## Supplementary material

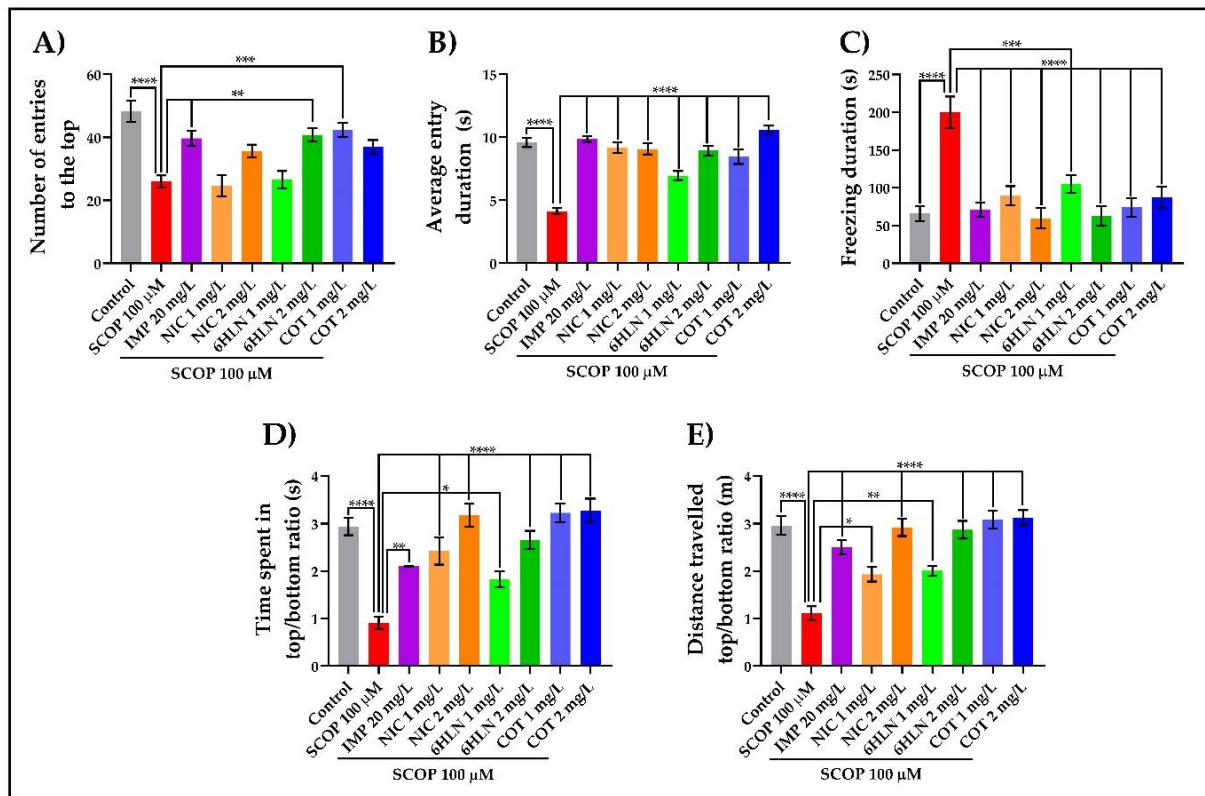

**Figure S1.** The effects of NIC, 6HLN and COT (1 and 2 mg/L) administration in SCOP-treated zebrafish on anxiety-like behavior evaluated within NTT. The number of entries to the top (A), average entry duration (B) freezing duration (C), time spent in top/bottom ratio (D) and distance travelled top/bottom ratio (E) were the additional parameters for measuring the anxiety like behavior. The values are expressed as means  $\pm$  S.E.M. (n=10). ANOVA analysis identified overall significant differences between the experimental groups for (A)  $F(8,81)=10.41$ ,  $p<0.0001$ , (B)  $F(8,81)=25.10$ ,  $p<0.0001$ , (C)  $F(8,81)=10.68$ ,  $p<0.0001$ , (D)  $F(8,81)=15.4$ ,  $p<0.0001$  and (E)  $F(8,81)=17.11$ ,  $p<0.0001$ . For Tukey *post hoc* analyses – \*\*\*\*  $p<0.0001$ , \*\*\*  $p<0.001$ , \*\*  $p<0.01$  and \*  $p<0.05$ .

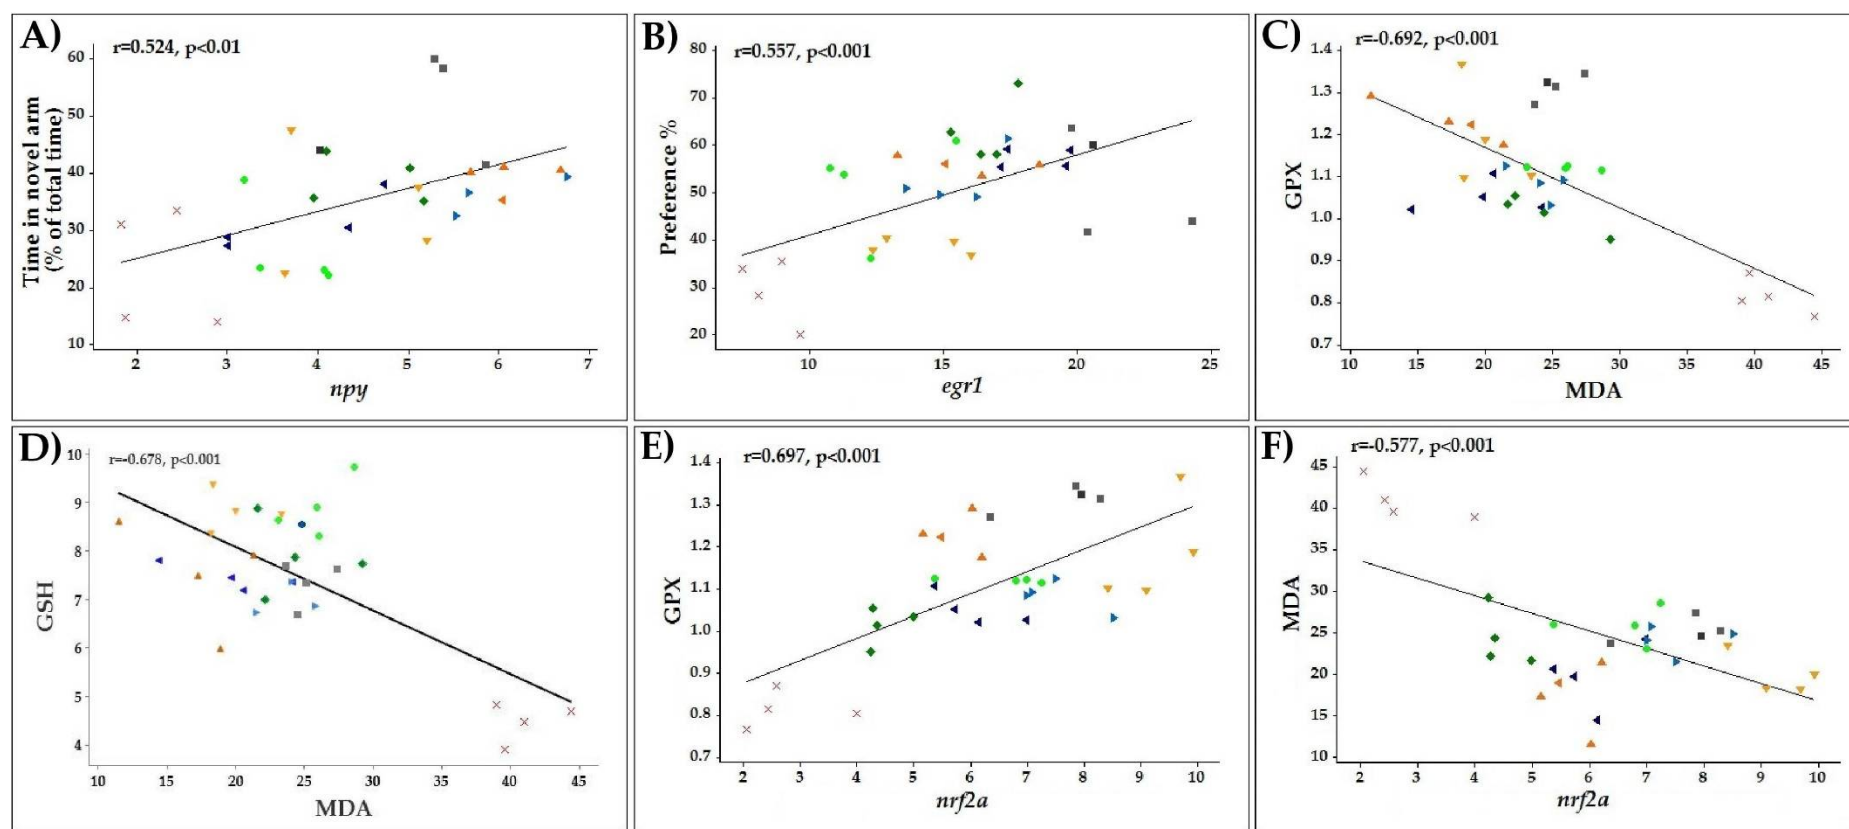

**Figure S2.** Pearson's correlation coefficient between behavioral or biochemical parameters and MDA or markers of gene expression (n=10 animals per group): (A) Time in the novel arm (% of total time) vs. *npy* ( $r=0.524$ ,  $p<0.01$ ), (B) Preference % vs. *egr1* ( $r=0.557$ ,  $p<0.001$ ), (C) GPX vs. MDA ( $r=-0.692$ ,  $p<0.001$ ), (D) GSH vs. MDA ( $r=-0.678$ ,  $p<0.001$ ), (E) GPX vs *nrf2a* ( $r=0.697$ ,  $p<0.001$ ) and (F) MDA vs. *nrf2a* ( $r=-0.577$ ,  $p<0.001$ ) in control (○), SCOP (×), NIC 1 mg/L + SCOP (▼), NIC 2 mg/L + SCOP (▲), 6HLN 1mg/L + SCOP (●), 6HLN 2 mg/L + SCOP (◆), COT 1 mg/L + SCOP (▶) and COT 2 mg/L + SCOP (◀). Data are expressed as follow: MDA (μmol/L), GPX (U/mg protein), GSH (μg GSH/μg protein), *nrf2a* (mRNA copy number, x10000), *egr1* (mRNA copy number, x10000) and *npy* (mRNA copy number, x10000).
